# Supplementary material for: Enhanced photoelectrochemical water splitting of In-doped TiO 2 nanorods with oxygen vacancies: synergistic effects of band structure and charge carrier dynamics engineering
Source: Royal Society of Chemistry journal article supplement (doi:10.1039/d5cy00739a), 2025-10-03
Supplement: d5cy00739a1.pdf [file d5cy00739a1.pdf]

## Supporting Information

**Enhanced Photoelectrochemical Water Splitting of In-Doped TiO<sub>2</sub>**

**Nanorods with Oxygen Vacancies: Synergistic Effects of Band**

**Structure and Charge Carrier Dynamics Engineering**

**Suyi Yang <sup>a</sup>, Baoyuan Wang <sup>a</sup>, Yan Zhang <sup>a</sup>, Chaofan Guo <sup>a</sup>, Sheng**

**Yang <sup>a</sup>, Liting Wei <sup>a</sup>, Jinzhan Su <sup>a\*</sup> and Liejin Guo <sup>a</sup>**

*<sup>a</sup>International Research Center for Renewable Energy, State Key Laboratory of  
Multiphase Flow in Power Engineering, Xi'an Jiaotong University, Xi'an, Shaanxi  
710049, People's Republic of China*

E-mail: [j.su@mail.xjtu.edu.cn](mailto:j.su@mail.xjtu.edu.cn)

---

\*Corresponding author.

E-mail: [j.su@mail.xjtu.edu.cn](mailto:j.su@mail.xjtu.edu.cn)

## **1.1 Materials for the experiments**

Fluorine-doped tin oxide substrates (FTO) coated glasses, acetone, ethanol, deionized water, acetylacetone, tetrabutyl titanate, hydrochloric acid and Indium chloride ( $\text{InCl}_3$ ).

## **1.2 Preparation of $\text{TiO}_2$ seed layer by spin-coating method**

Add 0.015M acetylacetone, 0.05M tetrabutyl titanate and 0.05M ethanol to 50ml deionised water to prepare the spin coating solution. A clean 1.5\*3 cm FTO is fixed on the spin coater at 2000 rpm for 60 s and spin coated three times. After spin coating, the FTO is removed and heated at 60 °C for 10 minutes on a heating table. The sample was then transferred to a muffle furnace and annealed at 450 °C for 30 min. After cooling, the sample was removed and repeatedly rinsed with deionised water and heated on a heating table at 60 °C for 10 min.

## **1.3 Preparation of $\text{TiO}_2$ NRs**

To 30 ml of deionised water add 30 ml of hydrochloric acid and 0.05 M tetrabutyl titanate. Transfer the FTO with the  $\text{TiO}_2$  seed layer to the above solution, placing the side with the seed layer towards the bottom. Transfer to an oven and hold at 160 °C for 6 h. After completion of hydrothermal heating remove the FTO and wash repeatedly, dry by heating at 60 °C on a heating table and then transfer to a muffle furnace to anneal at 450 °C for 2 h.

#### **1.4 Preparation of In/TiO<sub>2</sub> nanorod arrays (NRs)**

To 30 ml of deionised water add 26 ml of hydrochloric acid with tetrabutyl titanate and indium chloride in the ratios 2:10, 4:10, 6:10 and 9:10. Transfer the FTO with the TiO<sub>2</sub> seed layer to the above solution, placing the side with the seed layer towards the bottom. Transfer to an oven and hold at 160 °C for 6 h. After completion of hydrothermal heating remove the FTO and wash repeatedly, dry by heating at 60 °C on a heating table and then transfer to a muffle furnace to anneal at 450 °C for 2 h.

#### **1.5 Characterization**

The scanning electron microscope (SEM, JEOL JSM-7800 F) and transmission electron microscopy (TEM, JEOL JEM-2100) were utilized to study the morphology of the prepared samples. An X-ray diffractometer (PANalytical X'pert PRO, Cu K $\alpha$  irradiation ( $\lambda = 0.154184$  nm)) was employed to study the crystal structure of the hybrid films. Raman spectra (Jobin Yvon LabRAM Solei) were collected using a confocal laser Raman spectrometer equipped with a wavelength of 532 nm for STR500. The chemical elements and states of the films were recorded with an X-ray photoelectron spectrometer (XPS, AXIS ULtrabld) using Al K $\alpha$  (1486.6 eV) radiation as X-ray source and calibrated by C 1s (284.8 eV). A double-beam UV 4100 UV-vis-NIR spectrophotometer was used to investigate the UV-vis absorption spectra of the hybrid structure films. The PL spectra was obtained by using a FLS 980 fluorescence spectrophotometer at room temperature.

## 1.6 PEC measurements

The PEC measurements of photoanodes were performed using an electrochemical workstation (CHI 760E) in a standard three-electrode system. An as-obtained photoanode working electrode, a saturated Ag/AgCl reference electrode and a Pt foil counter electrode were used. A 0.5 M Na<sub>2</sub>SO<sub>4</sub> buffer solution (pH = 6.8) was used as the electrolyte. The intensity density of simulated sunlight is controlled at 100 mW cm<sup>-2</sup> by a 350 W Xenon lamp with an AM 1.5 G filter. All photoanodes were illuminated by simulated sunlight through the sample side (i.e., a front illumination). The tested area of the photoanode was about 0.196 cm<sup>2</sup>. Current density-potential and linear sweep voltammograms measurements were performed using the scan rate of 20 mV s<sup>-1</sup>. The tested cyclic voltammetry of the photoanode at scan rates from 20 mV/s to 200 mV/s.

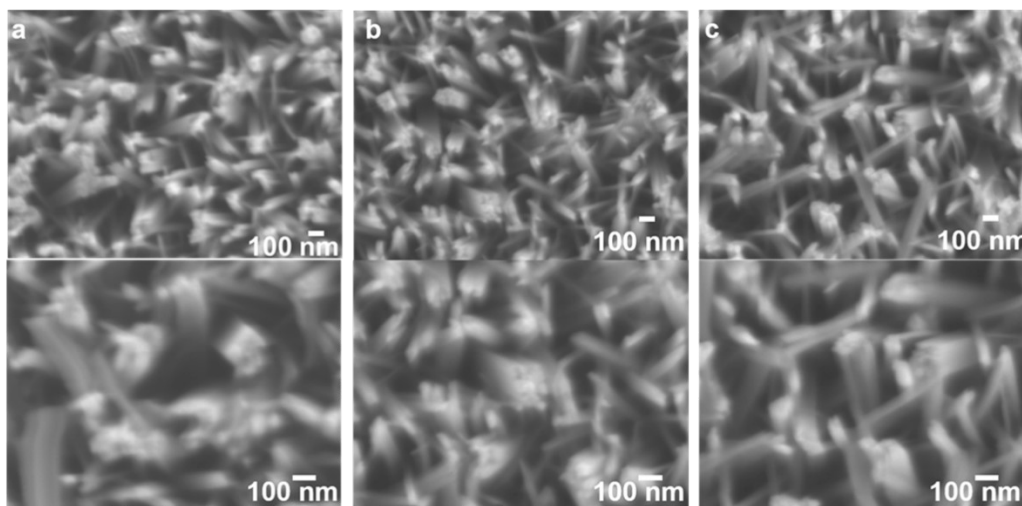

**Figure S1.** Low- and high-magnification SEM images of 2-In/TiO<sub>2</sub> NRs (a), 4-In/TiO<sub>2</sub> NRs(b) and 9-In/TiO<sub>2</sub> NRs(c).

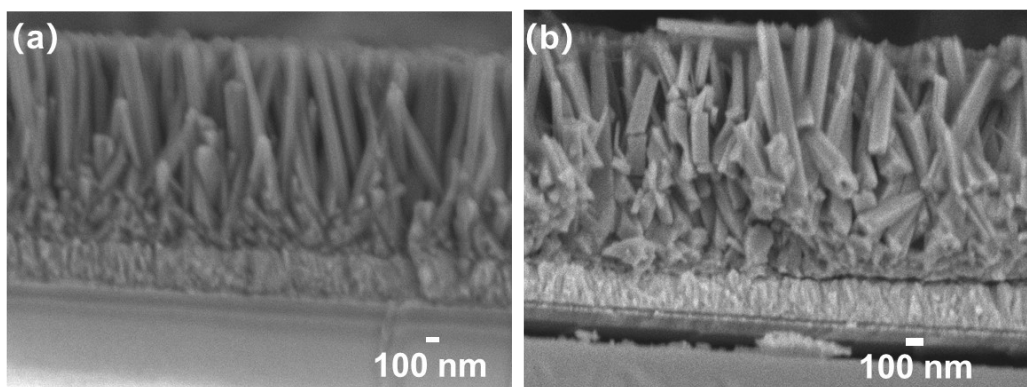

**Figure S2.** Cross-sectional SEM image of (a) pure  $\text{TiO}_2$  NRs and (b) 6-In/ $\text{TiO}_2$  NRs.

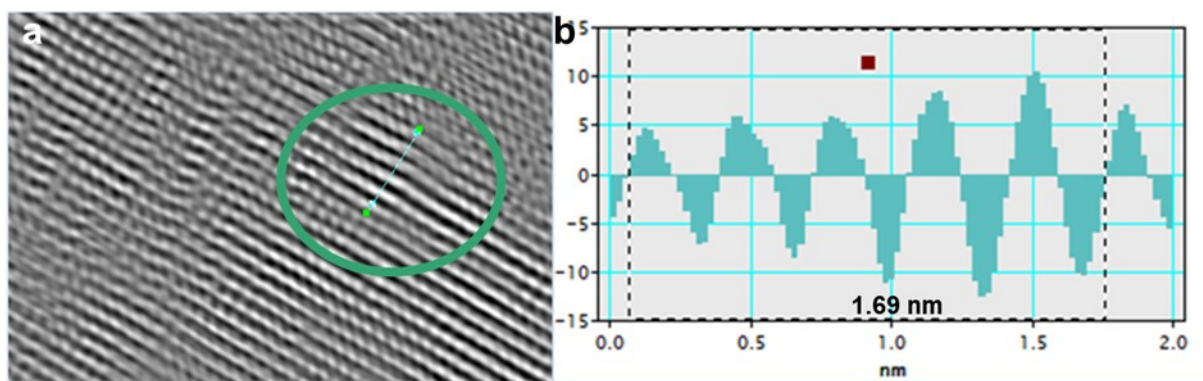

**Figure S3.** (a,b) IFFT image of 6-In/ $\text{TiO}_2$  NRs.

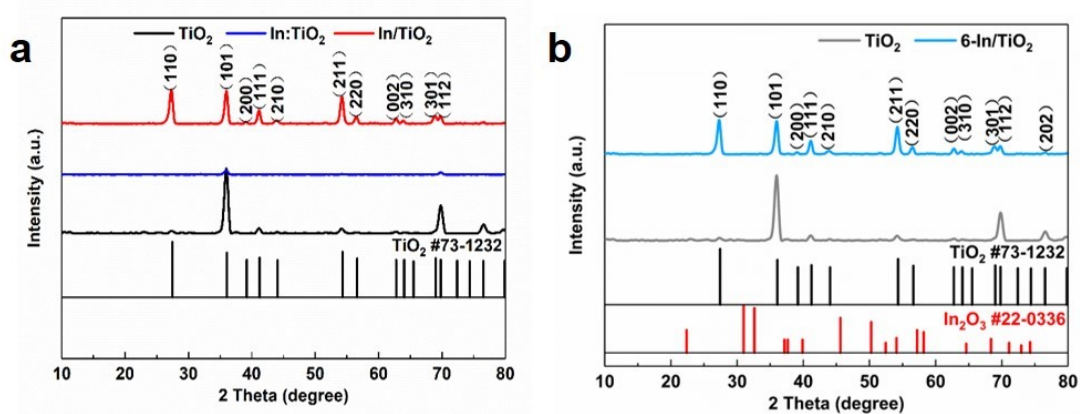

**Figure S4.** (a) XRD patterns of bare  $\text{TiO}_2$  NRs, 6-In: $\text{TiO}_2$  and 6-In/ $\text{TiO}_2$  NRs; (b) XRD patterns of pure  $\text{TiO}_2$  NRs and 6-In/ $\text{TiO}_2$  NRs.

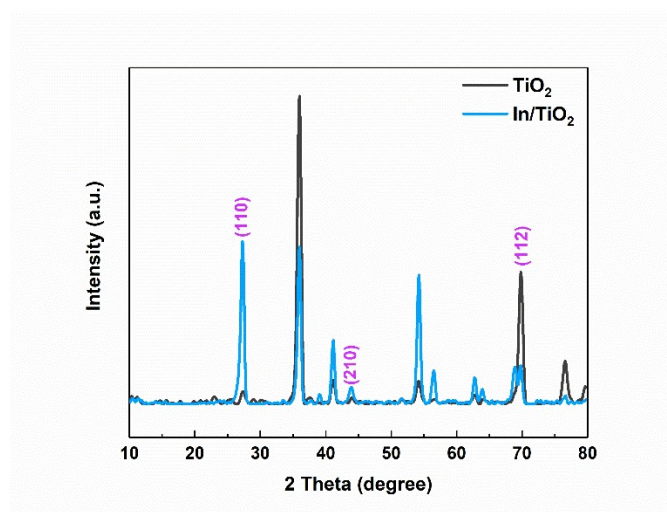

**Figure S5.** XRD patterns of pure  $\text{TiO}_2$  NRs and 6-In/ $\text{TiO}_2$  NRs

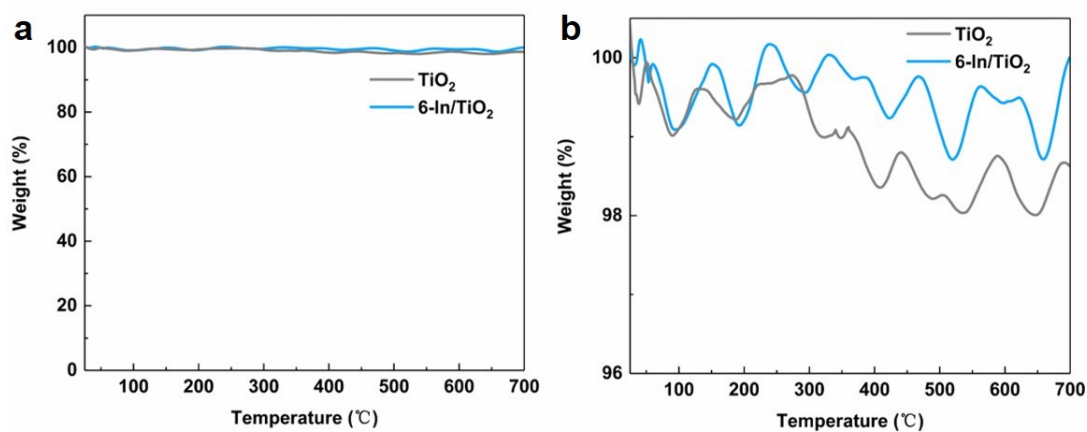

**Figure S6.** Thermogravimetric curves of  $\text{TiO}_2$  NRs and 6-In/ $\text{TiO}_2$  NRs.

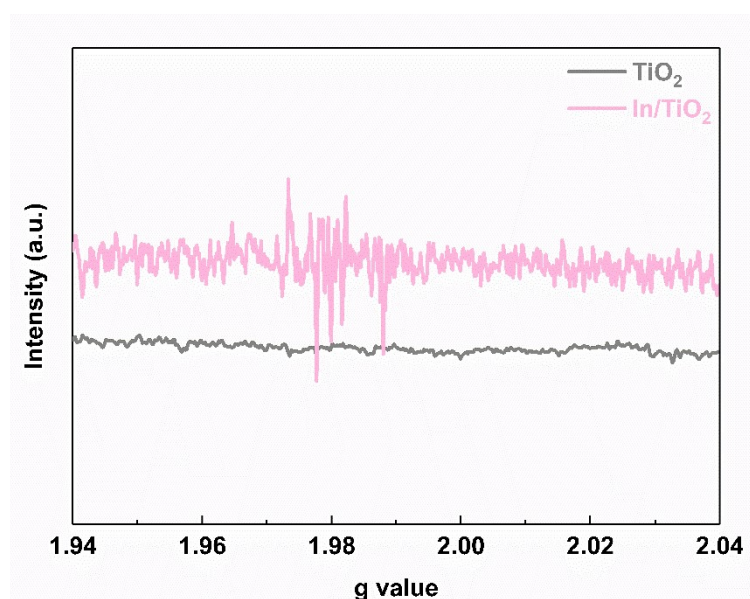

**Figure S7.** EPR spectrum of bare  $\text{TiO}_2$  and 6-In/ $\text{TiO}_2$  nanorod arrays.

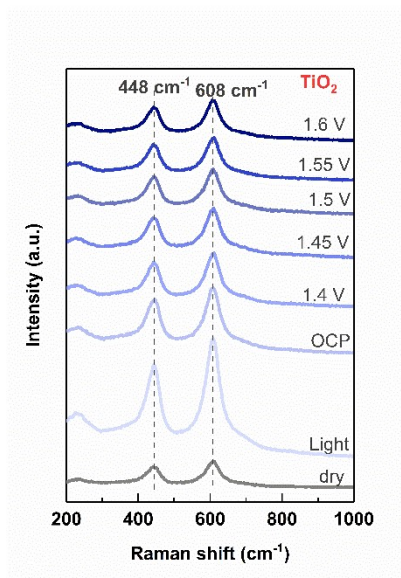

**Figure S8.** Operando Raman spectra of pure  $\text{TiO}_2$  NRs under various applied potentials vs RHE.

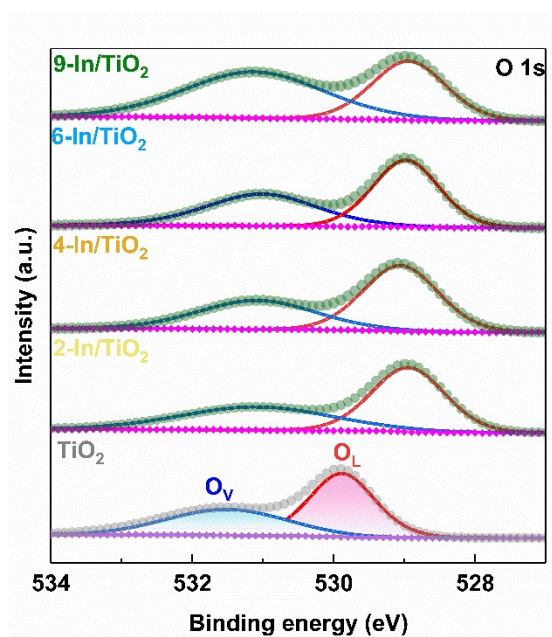

**Figure S9.** O 1s spectrum of bare  $\text{TiO}_2$  and In-doped  $\text{In/TiO}_2$  nanorod arrays.



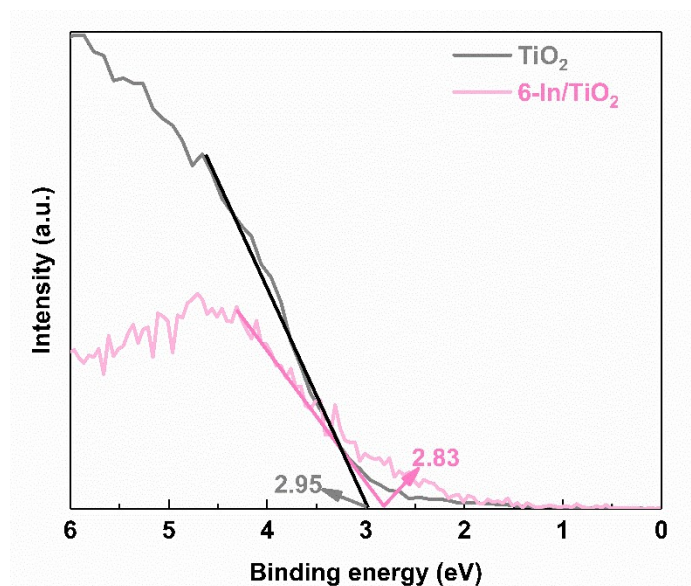

**Figure S10.** High-resolution VB XPS spectra of bare  $\text{TiO}_2$  NRs and 6-In/ $\text{TiO}_2$  NRs.

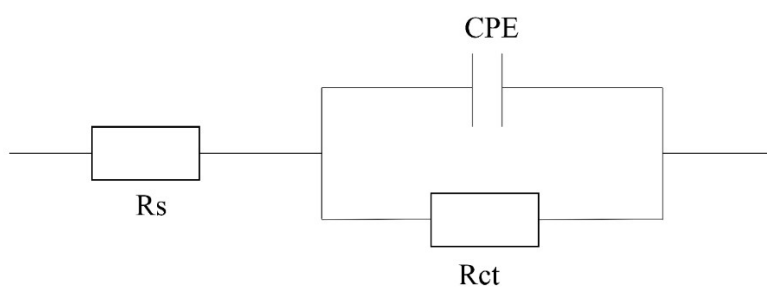

**Figure S11.** Simplified equivalent circuit used to fit EIS data in Nyquist plots.

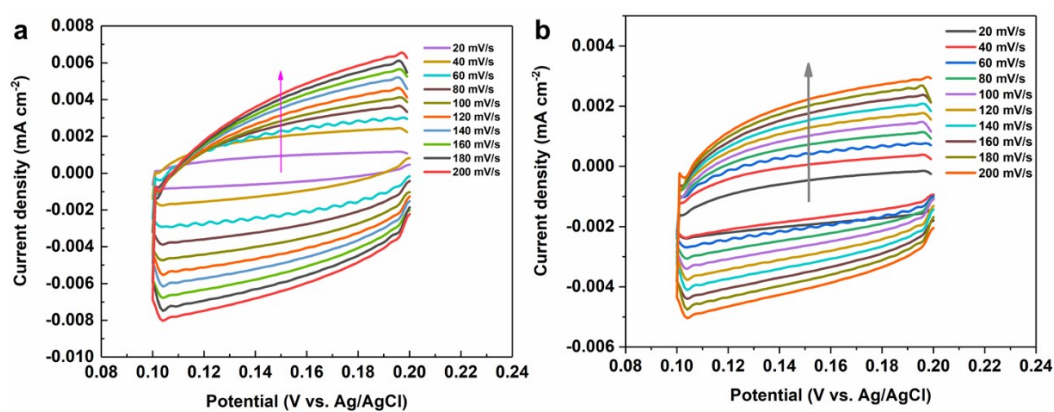

**Figure S12.** Cyclic voltammetry curves of the (a) 6-In/ $\text{TiO}_2$  and (b) bare  $\text{TiO}_2$  electrodes from 20 to 200 mV/s.



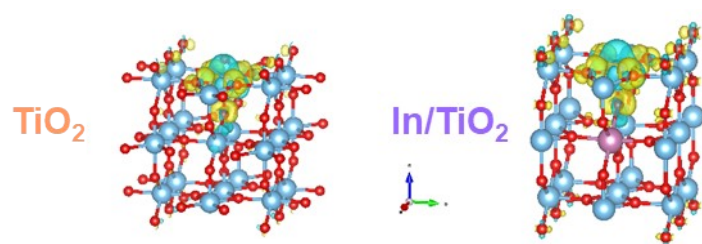

**Figure S13.** Differential charge density for pure  $\text{TiO}_2$  NRs and 6-In/ $\text{TiO}_2$  NRs.

**Table S1.**  $\text{O}_V/\text{O}_L$  ratio of different samples.

| Sample               | $\text{O}_V/\text{O}_L$ |
|----------------------|-------------------------|
| $\text{TiO}_2$       | 0.728:1                 |
| 2-In/ $\text{TiO}_2$ | 0.753:1                 |
| 4-In/ $\text{TiO}_2$ | 0.795:1                 |
| 6-In/ $\text{TiO}_2$ | 0.812:1                 |
| 9-In/ $\text{TiO}_2$ | 1.479:1                 |

**Table S2.** In/Ti atomic ratio of different samples.

| Sample               | In/Ti |
|----------------------|-------|
| $\text{TiO}_2$       | 0     |
| 2-In/ $\text{TiO}_2$ | 0.64% |
| 4-In/ $\text{TiO}_2$ | 2.72% |
| 6-In/ $\text{TiO}_2$ | 3.4%  |
| 9-In/ $\text{TiO}_2$ | 6.15% |

**Table S3.** Fitted values of PL decay kinetics of pure  $\text{TiO}_2$  and 6-In/ $\text{TiO}_2$

| Sample               | $B_1$  | $\tau_1(\text{ns})$ | $B_2$ | $\tau_2(\text{ns})$ | $\tau(\text{ns})$ |
|----------------------|--------|---------------------|-------|---------------------|-------------------|
| $\text{TiO}_2$       | 2182.2 | 1.0516              | 226.7 | 5.2279              | 2.4738            |
| 6-In/ $\text{TiO}_2$ | 2018.4 | 0.9491              | 252.7 | 4.7163              | 2.3940            |

**Table S4.** Fitted values of EIS data of different samples.

| Sample               | $R_s(\Omega)$ | $\text{CPE}(\mu\text{F})$ | $R_{ct}(\Omega)$ |
|----------------------|---------------|---------------------------|------------------|
| $\text{TiO}_2$       | 105.9         | 9.7                       | 5593             |
| 2-In/ $\text{TiO}_2$ | 139.7         | 5.0                       | 4155             |
| 4-In/ $\text{TiO}_2$ | 108.3         | 5.3                       | 3380             |
| 6-In/ $\text{TiO}_2$ | 84.2          | 13.3                      | 2340             |
| 9-In/ $\text{TiO}_2$ | 106.4         | 2.1                       | 5611             |
